# Supplementary material for: Revealing the tunability of electronic structures and optical properties of novel SWCNT derivatives, phenine nanotubes
Source: Royal Society of Chemistry journal article supplement (doi:10.1039/d1cp03932f), 2021-01-01
Supplement: d1cp03932f1.pdf [file d1cp03932f1.pdf]

*Supporting Information for*

**Revealing the Tunability of Electronic Structures and Optical Properties of Novel SWCNT Derivatives, Phenine Nanotubes**

Shunwei Chen<sup>1,2,\*</sup>, Yuhang Jiang<sup>1</sup>, Shangke Jia<sup>1</sup>, Hao Liu<sup>1</sup>, Guangwei Zhang<sup>1</sup>, Xiujun Han<sup>1,\*</sup>, Ruiqin Zhang<sup>2,\*</sup>

<sup>1</sup>School of Materials Science and Engineering, Qilu University of Technology (Shandong Academy of Sciences), Jinan, China

<sup>2</sup>Department of Physics, City University of Hong Kong, Kowloon, Hong Kong SAR, China

\*Corresponding author. E-mail address: swchen5-c@my.cityu.edu.hk (S. Chen), xjhan@qlu.edu.cn (X. Han), aprqz@cityu.edu.hk (R. Zhang)

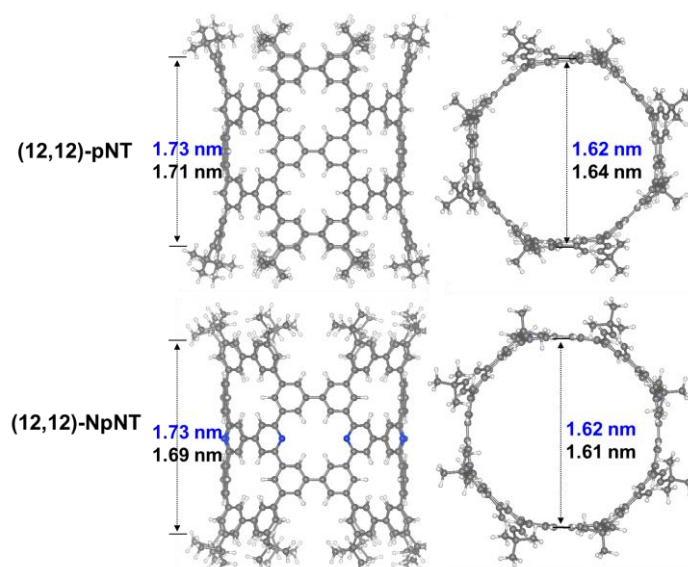

**Figure S1.** Experimental and theoretical results for the length and diameter of (12,12)-pNT and (12,12)-NpNT. The values in blue show our theoretical results, while the black ones show the experimental data.

**Table S1.** Details of the HOMO-LUMO energy levels and the gaps of (12,12)-pNT and 1212pNT, together with their lowest excitation energy and corresponding oscillator strength ( $f$ ).

| Structure   | HOMO   | LUMO  | H-L gap (eV) | S <sub>0</sub> -S <sub>1</sub> (nm) | $f$    |
|-------------|--------|-------|--------------|-------------------------------------|--------|
| (12,12)-pNT | -3.371 | 0.327 | 3.698        | 335                                 | 0.0000 |
| 1212pNT     | -3.559 | 0.179 | 3.738        | 331                                 | 0.0000 |

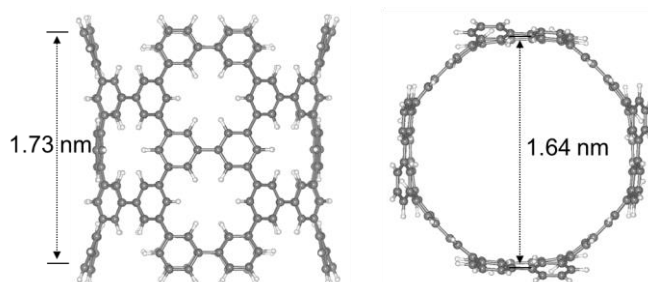

**Figure S2.** Theoretically predicted structural parameters of 1212pNT with edge sp<sup>2</sup>-carbons terminated by hydrogen atoms.

**Table S2.** Oscillator strengths of the lowest 10 vertical excitations of all the studied structures.

| <b>Transitions</b>              | <b>Pre-99pNT</b> | <b>99pNT</b>       | <b>99pNT-L1</b>   | <b>99pNT-L2</b>   | <b>99pNT-L3</b>    | <b>1212pNT</b>  | <b>1515pNT</b>  |
|---------------------------------|------------------|--------------------|-------------------|-------------------|--------------------|-----------------|-----------------|
| S <sub>0</sub> →S <sub>1</sub>  | 0.0004           | 0.0000             | 0.0000            | 0.0000            | 0.0000             | 0.0000          | 0.0000          |
| S <sub>0</sub> →S <sub>2</sub>  | 0.0003           | 0.0000             | 0.0000            | 0.0000            | 0.0000             | 0.0000          | 0.0000          |
| S <sub>0</sub> →S <sub>3</sub>  | 0.0003           | 0.0000             | 0.0000            | 0.0000            | 0.0000             | 0.0000          | 0.0000          |
| S <sub>0</sub> →S <sub>4</sub>  | 0.0000           | 0.0000             | 0.0000            | 0.0000            | 0.0000             | 0.0000          | 0.0000          |
| S <sub>0</sub> →S <sub>5</sub>  | 0.0008           | 0.0000             | 0.0000            | 0.0000            | 0.0000             | 0.0000          | 0.0000          |
| S <sub>0</sub> →S <sub>6</sub>  | 0.0008           | 0.0000             | 0.0000            | 0.0000            | 0.0000             | 0.0000          | 0.0000          |
| S <sub>0</sub> →S <sub>7</sub>  | 0.0011           | 0.0000             | 0.0000            | 0.0000            | 0.0000             | 0.0000          | 0.0000          |
| S <sub>0</sub> →S <sub>8</sub>  | 0.0011           | 0.0000             | 0.0000            | 0.0000            | 0.0000             | 0.0000          | 0.0001          |
| S <sub>0</sub> →S <sub>9</sub>  | 0.0000           | 0.0001             | 0.0000            | 0.0000            | 0.0000             | 0.0000          | 0.0000          |
| S <sub>0</sub> →S <sub>10</sub> | 0.0000           | 0.0000             | 0.0000            | 0.0000            | 0.0000             | 0.0000          | 0.0000          |
| <b>Transitions</b>              | <b>1818pNT</b>   | <b>99pNT-2N</b>    | <b>99pNT-4N</b>   | <b>99pNT-6N</b>   | <b>99pNT-L3-6N</b> | <b>99pNT-2H</b> | <b>99pNT-4H</b> |
| S <sub>0</sub> →S <sub>1</sub>  | 0.0000           | 0.0000             | 0.0000            | 0.0000            | 0.0000             | 0.3662          | 0.0012          |
| S <sub>0</sub> →S <sub>2</sub>  | 0.0000           | 0.0001             | 0.0000            | 0.0000            | 0.0000             | 0.0017          | 0.0008          |
| S <sub>0</sub> →S <sub>3</sub>  | 0.0000           | 0.0017             | 0.0010            | 0.0000            | 0.0000             | 0.0022          | 0.2826          |
| S <sub>0</sub> →S <sub>4</sub>  | 0.0000           | 0.0017             | 0.0001            | 0.0000            | 0.0000             | 0.1451          | 0.0966          |
| S <sub>0</sub> →S <sub>5</sub>  | 0.0000           | 0.0002             | 0.0009            | 0.0000            | 0.0000             | 0.0203          | 0.1187          |
| S <sub>0</sub> →S <sub>6</sub>  | 0.0000           | 0.0000             | 0.0022            | 0.0000            | 0.0000             | 0.0010          | 0.0011          |
| S <sub>0</sub> →S <sub>7</sub>  | 0.0000           | 0.0000             | 0.0000            | 0.0002            | 0.0000             | 0.0000          | 0.0033          |
| S <sub>0</sub> →S <sub>8</sub>  | 0.0000           | 0.0069             | 0.0033            | 0.0002            | 0.0000             | 0.0017          | 0.4857          |
| S <sub>0</sub> →S <sub>9</sub>  | 0.0001           | 0.0001             | 0.0008            | 0.0000            | 0.0000             | 0.0027          | 0.0236          |
| S <sub>0</sub> →S <sub>10</sub> | 0.0001           | 0.0007             | 0.0000            | 0.0000            | 0.0000             | 0.1083          | 0.0003          |
| <b>Transitions</b>              | <b>99pNT-6H</b>  | <b>99pNT-L3-2H</b> | <b>1212pNT-2H</b> | <b>1212pNT-4H</b> | <b>1212pNT-8H</b>  |                 |                 |
| S <sub>0</sub> →S <sub>1</sub>  | 0.0008           | 0.3223             | 0.6810            | 0.0019            | 0.0000             |                 |                 |
| S <sub>0</sub> →S <sub>2</sub>  | 0.0017           | 0.0003             | 0.0002            | 0.0014            | 0.0003             |                 |                 |
| S <sub>0</sub> →S <sub>3</sub>  | 0.0005           | 0.0017             | 0.0006            | 0.7870            | 0.0003             |                 |                 |
| S <sub>0</sub> →S <sub>4</sub>  | 0.0002           | 0.0001             | 0.0931            | 0.0148            | 0.0000             |                 |                 |
| S <sub>0</sub> →S <sub>5</sub>  | 0.0012           | 0.0007             | 0.0000            | 0.3373            | 0.0000             |                 |                 |
| S <sub>0</sub> →S <sub>6</sub>  | 0.0000           | 0.0000             | 0.0009            | 0.0000            | 0.0043             |                 |                 |
| S <sub>0</sub> →S <sub>7</sub>  | 0.0001           | 0.0002             | 0.0005            | 0.0311            | 0.0043             |                 |                 |
| S <sub>0</sub> →S <sub>8</sub>  | 0.7859           | 0.0001             | 0.0178            | 0.0006            | 0.0000             |                 |                 |
| S <sub>0</sub> →S <sub>9</sub>  | 0.0005           | 0.0331             | 0.0004            | 0.3610            | 0.0000             |                 |                 |
| S <sub>0</sub> →S <sub>10</sub> | 0.7012           | 0.0008             | 0.0101            | 0.0125            | 0.0004             |                 |                 |

**Table S3.** Ground state HOMO-LUMO energy levels and corresponding gaps of the studied phenine nanotubes (energy unit in eV).

|         |                       |                         |                        |                        |                         |                      |                      |
|---------|-----------------------|-------------------------|------------------------|------------------------|-------------------------|----------------------|----------------------|
|         | <b>Pre-<br/>99pNT</b> | <b>99pNT</b>            | <b>99pNT-L1</b>        | <b>99pNT-L2</b>        | <b>99pNT-L3</b>         | <b>1212pNT</b>       | <b>1515pNT</b>       |
| LUMO    | 0.306                 | 0.185                   | 0.115                  | 0.077                  | 0.044                   | 0.179                | 0.168                |
| HOMO    | -3.535                | -3.554                  | -3.593                 | -3.615                 | -3.627                  | -3.559               | -3.563               |
| H-L gap | 3.841                 | 3.739                   | 3.708                  | 3.693                  | 3.671                   | 3.738                | 3.731                |
|         | <b>1818pNT</b>        | <b>99pNT-2N</b>         | <b>99pNT-4N</b>        | <b>99pNT-6N</b>        | <b>99pNT-L3-<br/>6N</b> | <b>99pNT-<br/>2H</b> | <b>99pNT-<br/>4H</b> |
| LUMO    | 0.158                 | -0.514                  | -0.515                 | -0.511                 | -0.635                  | -0.566               | -0.589               |
| HOMO    | -3.568                | -3.561                  | -3.578                 | -3.626                 | -3.637                  | -2.356               | -2.354               |
| H-L gap | 3.726                 | 3.046                   | 3.063                  | 3.116                  | 3.001                   | 1.790                | 1.765                |
|         | <b>99pNT-<br/>6H</b>  | <b>99pNT-L3-<br/>2H</b> | <b>1212pNT-<br/>2H</b> | <b>1212pNT-<br/>4H</b> | <b>1212pNT-<br/>8H</b>  |                      |                      |
| LUMO    | -0.594                | -0.689                  | -0.644                 | -0.655                 | -0.667                  |                      |                      |
| HOMO    | -2.353                | -2.484                  | -2.391                 | -2.381                 | -2.372                  |                      |                      |
| H-L gap | 1.759                 | 1.795                   | 1.747                  | 1.726                  | 1.705                   |                      |                      |

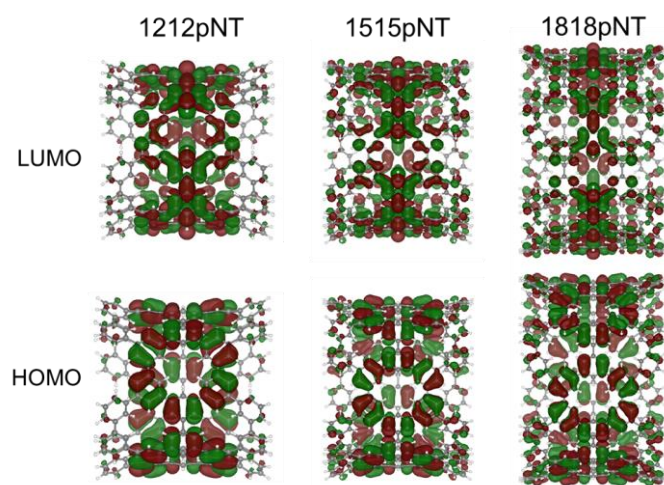

**Figure S3.** Ground-state HOMO and LUMO spatial distributions of phenine nanotubes with varying diameters.
